# Supplementary material for: Tobacco Quit Intentions and Behaviors among Cigar Smokers in the United States in Response to COVID-19
Source: Int J Environ Res Public Health. 2020 Jul 25;17(15):5368. doi: 10.3390/ijerph17155368 (PMC7432467; doi:10.3390/ijerph17155368)
Supplement: Supplementary file 1 [file ijerph-17-05368-s001.pdf]

## Supplementary Tables

**Table S1.** Measures

| Construct                                                              | Item(s)                                                                                                                                                                                                                                                                     | Response scale                                                                                                                                                                                                                                                                                                           |
|------------------------------------------------------------------------|-----------------------------------------------------------------------------------------------------------------------------------------------------------------------------------------------------------------------------------------------------------------------------|--------------------------------------------------------------------------------------------------------------------------------------------------------------------------------------------------------------------------------------------------------------------------------------------------------------------------|
| Instructions                                                           | Over the past few months, a new respiratory disease, coronavirus 2019 or COVID-19, has been in the news as it spreads around the world and within the United States.<br><br>The next few questions are about the recent coronavirus outbreak.                               | --                                                                                                                                                                                                                                                                                                                       |
| Frequency of social distancing efforts                                 | Physical distancing, or social distancing, is the practice of deliberately increasing the physical space between people to avoid spreading illness. How often do you currently practice <b>daily</b> social distancing as a result of COVID-19?                             | 5 = Always<br>4 = Usually<br>3 = About half the time<br>2 = Seldom<br>1 = Never                                                                                                                                                                                                                                          |
| Quit attempts since COVID-19 started                                   | Since COVID-19 started, how many times have you stopped smoking for 1 day or longer because you were trying to quit smoking?                                                                                                                                                | Free response 0-30                                                                                                                                                                                                                                                                                                       |
| Quitline use due to COVID-19                                           | Since COVID-19 started, have you called the Quitline (national phone number for help to quit smoking)?                                                                                                                                                                      | 1 = Yes<br>0 = No                                                                                                                                                                                                                                                                                                        |
| Quit intentions due to COVID-19                                        | How interested are you in quitting smoking in the next 6 months because of COVID-19?                                                                                                                                                                                        | 4=Very interested<br>3=Somewhat interested<br>2=A little interested<br>1=Not at all interested                                                                                                                                                                                                                           |
|                                                                        | How much do you plan to quit smoking in the next 6 months because of COVID-19?                                                                                                                                                                                              | 4=Very much<br>3=Somewhat<br>2=A little<br>1=Not at all                                                                                                                                                                                                                                                                  |
|                                                                        | How likely are you to quit smoking in the next 6 months because of COVID-19?                                                                                                                                                                                                | 4=Very likely<br>3=Somewhat likely<br>2=A little likely<br>1=Not at all likely                                                                                                                                                                                                                                           |
| Perceived risk of complications due to COVID-19 compared to non-smoker | Please think about if you were to become infected with the coronavirus.<br><br>Compared to a non-smoker, what impact do you think that your smoking has on your risk of serious health complications, hospitalization, and death from COVID-19? Compared to a non-smoker... | 1 = My smoking gives me a much higher risk of complications from COVID-19<br>2 = My smoking gives me a slightly higher risk of complications from COVID-19<br>3 = My smoking gives me about the same risk of complications from COVID-19<br>4 = My smoking gives me a slightly lower risk of complications from COVID-19 |

|                                              |                                                                                               |                                                                                                                             |
|----------------------------------------------|-----------------------------------------------------------------------------------------------|-----------------------------------------------------------------------------------------------------------------------------|
|                                              |                                                                                               | 5 = My smoking gives me a much lower risk of complications from COVID-19                                                    |
| Change in tobacco use since COVID-19 started | Since COVID-19 started infecting people in the US, would you say that your tobacco use has... | 1 = Increased a lot<br>2 = Increased a little<br>3 = Stayed about the same<br>4 = Decreased a little<br>5 = Decreased a lot |
| COVID-19 risk perceptions                    | How likely is it that you will become infected with COVID-19 at some point in the future?     | 4=Very Likely<br>3=Likely<br>2=Unlikely<br>1=Very Unlikely                                                                  |
|                                              | How fearful are you about becoming infected with COVID-19 at some point in the future?        | 4=Very fearful<br>3=Fearful<br>2=A little fearful<br>1=Not at all fearful                                                   |
|                                              | How vulnerable do you feel to becoming infected with COVID-19?                                | 4=Very vulnerable<br>3=Vulnerable<br>2=A little vulnerable<br>1=Not at all vulnerable                                       |

**Table S2.** Bivariate associations between correlates and quit intentions due to COVID-19 (higher values indicate higher intentions to quit)

| Variable                                | Mean (SD)  | p-value <sup>a</sup> | Correlation value | p-value <sup>b</sup> |
|-----------------------------------------|------------|----------------------|-------------------|----------------------|
| Age                                     | --         | --                   | r = -0.14         | p<0.001              |
| Gender                                  |            |                      |                   |                      |
| Male                                    | 2.7 (1.0)  | p=0.04               | --                | --                   |
| Female                                  | 2.5 (1.1)  |                      | --                |                      |
| Transgender or other                    | 2.7 (0.7)  |                      | --                |                      |
| Sexual orientation                      |            |                      |                   |                      |
| Heterosexual or straight                | 2.6 (1.1)  | p=0.22               | --                | --                   |
| Gay, lesbian, bisexual, other           | 2.7 (1.1)  |                      | --                |                      |
| Ethnicity                               |            |                      |                   |                      |
| Not Hispanic or Latino                  | 2.6 (1.1)  | p=0.005              | --                | --                   |
| Hispanic or Latino                      | 2.9 (1.0)  |                      | --                |                      |
| Race                                    |            |                      |                   |                      |
| White                                   | 2.5 (1.1)  | p=0.01               | --                | --                   |
| Black or African American               | 2.7 (1.1)  |                      | --                |                      |
| American Indian or Alaska Native        | 2.8 (1.0)  |                      | --                |                      |
| Asian                                   | 3.1 (0.8)  |                      | --                |                      |
| Pacific Islander                        | 3.3 (0.9)  |                      | --                |                      |
| Other                                   | 2.5 (1.0)  |                      | --                |                      |
| Education                               |            |                      |                   |                      |
| High school degree or less              | 2.4 (1.1)  | p<0.001              | --                | --                   |
| Some college                            | 2.4 (1.1)  |                      | --                |                      |
| Bachelor's or Associate's degree        | 2.6 (1.0)  |                      | --                |                      |
| Graduate degree                         | 3.1 (0.9)  |                      | --                |                      |
| Income                                  |            |                      |                   |                      |
| Below \$25,000 per year                 | 2.2 (1.05) | p<0.001              | --                | --                   |
| Between \$25,000 and \$49,999 per year  | 2.5 (1.08) |                      | --                |                      |
| Between \$50,000 and \$74, 999 per year | 2.7 (1.0)  |                      | --                |                      |
| Between \$75,000 and \$100,000 per year | 2.9 (1.0)  |                      | --                |                      |
| Above \$100,000 per year                | 2.9 (1.0)  |                      |                   |                      |
| Perceived physical health               | --         | --                   | r = 0.20          | p<0.001              |
| Perceived mental health                 | --         | --                   | r = 0.20          | p<0.001              |
| Cigarette user                          |            |                      |                   |                      |
| No                                      | 2.7 (1.0)  | p=0.47               | --                | --                   |
| Yes                                     | 2.6 (1.1)  |                      | --                |                      |
| E-cigarette user                        |            |                      |                   |                      |
| No                                      | 2.5 (1.1)  | p=0.006              | --                | --                   |
| Yes                                     | 2.7 (1.0)  |                      | --                |                      |
| Smokeless tobacco user                  |            |                      |                   |                      |
| No                                      | 2.5 (1.1)  | p<0.001              | --                | --                   |
| Yes                                     | 3.0 (1.0)  |                      | --                |                      |
| Waterpipe tobacco user                  |            |                      |                   |                      |
| No                                      | 2.6 (1.1)  | p=0.009              | --                | --                   |

|                                                                          |           |             |            |             |
|--------------------------------------------------------------------------|-----------|-------------|------------|-------------|
| Yes                                                                      | 2.9 (0.9) |             | --         |             |
| Nicotine dependence                                                      | --        | --          | $r = 0.15$ | $p < 0.001$ |
| Quitline use due to COVID-19                                             |           |             |            |             |
| No                                                                       | 2.4 (1.1) | $p < 0.001$ | --         | --          |
| Yes                                                                      | 3.3 (0.7) |             | --         |             |
| Perceived risk of complications due to COVID-19, compared to non-smokers |           |             |            |             |
| Much higher/slightly higher risk                                         | 2.8 (1.0) | $p < 0.001$ | --         | --          |
| Same risk                                                                | 2.0 (1.0) |             | --         |             |
| Lower or slightly lower risk                                             | 2.3 (1.1) |             | --         |             |
| COVID-19 risk perceptions <sup>c</sup>                                   | --        | --          | $r = 0.46$ | $p < 0.001$ |
| Frequency of social distancing efforts                                   | --        | --          | $r = 0.20$ | $p < 0.001$ |
| <sup>a</sup> p-values are from t-tests or ANOVAs                         |           |             |            |             |
| <sup>b</sup> p-values are from correlation tests                         |           |             |            |             |

**Table S3.** Bivariate associations between variables and whether participants made a quit attempt or not since COVID-19 started

| Variable                                | % of group who made a quit attempt <sup>a</sup><br>(n / row n) | p-value <sup>b</sup> | Mean (SD)<br>among those who made a quit attempt | Mean (SD)<br>among those who did not make a quit attempt | p-value <sup>c</sup> |
|-----------------------------------------|----------------------------------------------------------------|----------------------|--------------------------------------------------|----------------------------------------------------------|----------------------|
| Age                                     | --                                                             | --                   | 42.5 (13.9)                                      | 36.9 (12.3)                                              | p<0.001              |
| Gender                                  |                                                                |                      |                                                  |                                                          |                      |
| Male                                    | 51.7% (201 / 389)                                              | p=0.01               | --                                               | --                                                       | --                   |
| Female                                  | 41.3% (157 / 380)                                              |                      | --                                               | --                                                       |                      |
| Transgender or other                    | 37.5% (3 / 8)                                                  |                      | --                                               | --                                                       |                      |
| Sexual orientation                      |                                                                |                      |                                                  |                                                          |                      |
| Heterosexual or straight                | 45.5% (309 / 679)                                              | p=0.16               | --                                               | --                                                       | --                   |
| Gay, lesbian, bisexual, other           | 53.1% (52 / 98)                                                |                      | --                                               | --                                                       |                      |
| Ethnicity                               |                                                                |                      |                                                  |                                                          |                      |
| Not Hispanic or Latino                  | 43.7% (288 / 659)                                              | p<0.001              | --                                               | --                                                       |                      |
| Hispanic or Latino                      | 61.5% (72 / 117)                                               |                      | --                                               | --                                                       |                      |
| Race                                    |                                                                |                      |                                                  |                                                          |                      |
| White                                   | 43.2% (222 / 514)                                              | p=0.05               | --                                               | --                                                       | --                   |
| Black or African American               | 53.6% (96 / 179)                                               |                      | --                                               | --                                                       |                      |
| American Indian or Alaska Native        | 42.11% (8 / 19)                                                |                      | --                                               | --                                                       |                      |
| Asian                                   | 60.6% (20 / 33)                                                |                      | --                                               | --                                                       |                      |
| Pacific Islander                        | 100.0% (2 / 2)                                                 |                      | --                                               | --                                                       |                      |
| Other                                   | 43.3% (13 / 30)                                                |                      | --                                               | --                                                       |                      |
| Education                               |                                                                |                      |                                                  |                                                          |                      |
| High school degree or less              | 37.2% (81 / 281)                                               | p<0.001              | --                                               | --                                                       | --                   |
| Some college                            | 36.7% (59 / 161)                                               |                      | --                                               | --                                                       |                      |
| Bachelor's or Associate's degree        | 44.8% (116 / 259)                                              |                      | --                                               | --                                                       |                      |
| Graduate degree                         | 75.5% 105 / 139                                                |                      | --                                               | --                                                       |                      |
| Income                                  |                                                                |                      |                                                  |                                                          |                      |
| Below \$25,000 per year                 | 31.8% (61 / 192)                                               | p<0.001              | --                                               | --                                                       | --                   |
| Between \$25,000 and \$49,999 per year  | 42.7% (82 / 192)                                               |                      | --                                               | --                                                       |                      |
| Between \$50,000 and \$74, 999 per year | 48.3% (71 / 147)                                               |                      | --                                               | --                                                       |                      |
| Between \$75,000 and \$100,000 per year | 56.3% (63 / 112)                                               |                      | --                                               | --                                                       |                      |
| Above \$100,000 per year                | 62.7% (84 / 134)                                               |                      | --                                               | --                                                       |                      |
| Perceived physical health               | --                                                             | --                   | 3.7 (1.0)                                        | 3.4 (1.0)                                                | p<0.001              |
| Perceived mental health                 | --                                                             |                      | 3.7 (1.1)                                        | 3.5 (1.1)                                                | p=0.004              |
| Cigarette user                          |                                                                |                      |                                                  |                                                          |                      |
| No                                      | 57.1% (72 / 126)                                               | p=0.009              | --                                               | --                                                       | --                   |

|                                                                                                                                                                                                                                                               |                   |         |           |           |         |
|---------------------------------------------------------------------------------------------------------------------------------------------------------------------------------------------------------------------------------------------------------------|-------------------|---------|-----------|-----------|---------|
| Yes                                                                                                                                                                                                                                                           | 44.4% (289 / 651) |         | --        | --        |         |
| E-cigarette user                                                                                                                                                                                                                                              |                   |         |           |           |         |
| No                                                                                                                                                                                                                                                            | 42.8% (207 / 484) | p=0.008 | --        | --        | --      |
| Yes                                                                                                                                                                                                                                                           | 52.6% (154 / 293) |         | --        | --        |         |
| Smokeless tobacco user                                                                                                                                                                                                                                        |                   |         |           |           |         |
| No                                                                                                                                                                                                                                                            | 38.4% (233 / 607) | p<0.001 | --        | --        | --      |
| Yes                                                                                                                                                                                                                                                           | 75.3% (128 / 170) |         | --        | --        |         |
| Waterpipe tobacco user                                                                                                                                                                                                                                        |                   |         |           |           |         |
| No                                                                                                                                                                                                                                                            | 43.3% (292 / 674) | p<0.001 | --        | --        | --      |
| Yes                                                                                                                                                                                                                                                           | 67.0% (69 / 103)  |         | --        | --        |         |
| Nicotine dependence                                                                                                                                                                                                                                           | --                | --      | 3.5 (1.4) | 2.9 (1.6) | p<0.001 |
| Quitline use due to COVID-19                                                                                                                                                                                                                                  |                   |         |           |           |         |
| No                                                                                                                                                                                                                                                            | 33.9% (203 / 599) | p<0.001 | --        | --        | --      |
| Yes                                                                                                                                                                                                                                                           | 88.8% (158 / 178) |         | --        | --        |         |
| Perceived risk of complications due to COVID-19 compared to non-smokers                                                                                                                                                                                       |                   |         |           |           |         |
| Much higher/slightly higher risk                                                                                                                                                                                                                              | 49.2% (290 / 590) | p=0.004 | --        | --        | --      |
| Same risk                                                                                                                                                                                                                                                     | 33.1% (43 / 130)  |         | --        | --        |         |
| Lower or slightly lower risk                                                                                                                                                                                                                                  | 48.21% (27 / 56)  |         | --        | --        |         |
| COVID-19 risk perceptions <sup>c</sup>                                                                                                                                                                                                                        | --                | --      | 2.8 (0.8) | 2.3 (0.8) | p<0.001 |
| Frequency of social distancing efforts                                                                                                                                                                                                                        | --                |         | 4.6 (0.7) | 4.5 (9.9) | p=0.10  |
| <sup>a</sup> Row percentages are provided. For instance, in the first cell, 57.14% of smokers made a quit attempt and 44.39% of non-smokers made a quit attempt.<br><sup>b</sup> p-values are from chi-square tests<br><sup>c</sup> p-values are from t-tests |                   |         |           |           |         |
